# Supplementary material for: A highly sensitive ion-selective chemiresistive sensor for online monitoring of lead ions in water
Source: Royal Society of Chemistry journal article supplement (doi:10.1039/d4an00159a), 2024-01-01
Supplement: d4an00159a1.pdf [file d4an00159a1.pdf]

## Supplementary Information

### A Highly Sensitive Ion-Selective Chemiresistive Sensor for Online Monitoring of Lead Ions in Water

Maryam Darestani-Farahani<sup>a</sup>, Isabella Mendoza<sup>a</sup>, Mehraneh Tavakkoli Gilavan<sup>b</sup>, Thomas Kirby<sup>a</sup>, Ponnambalam Ravi Selvaganapathy<sup>b,c</sup>, Peter Kruse<sup>a,\*</sup>

<sup>a</sup>Department of Chemistry and Chemical Biology, McMaster University, 1280 Main Street West, Hamilton, Ontario L8S 4M1, Canada

<sup>b</sup>Department of Biomedical Engineering, McMaster University, 1280 Main Street West, Hamilton, Ontario L8S 4L7, Canada

<sup>c</sup>Department of Mechanical Engineering, McMaster University, 1280 Main Street West, Hamilton, Ontario L8S 4L7, Canada

\*Corresponding Author: [pkruse@mcmaster.ca](mailto:pkruse@mcmaster.ca)

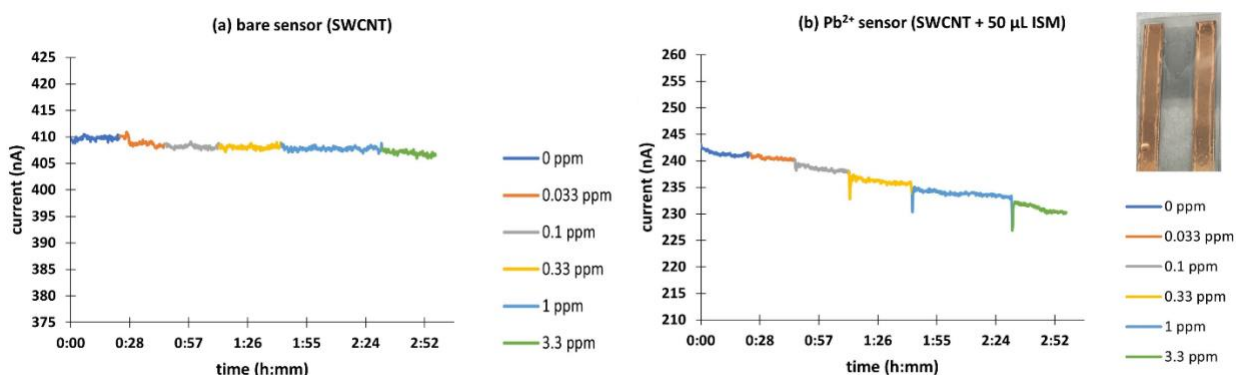

**Fig. S1** Sensitivity comparison of a bare device and a Pb<sup>2+</sup> sensor to lead ions in different concentrations (from 33 ppb to 3.3 ppm). (a) Resonance of a bare sensor made of SWCNT as a resistive film and (b) a Pb<sup>2+</sup> sensor made of SWCNT as a resistive film and coated with ISM (Drop-casted 50 µL of ISM solution on the SWCNT at the circular opening (Image of the actual sensor on the top right of the figure)).

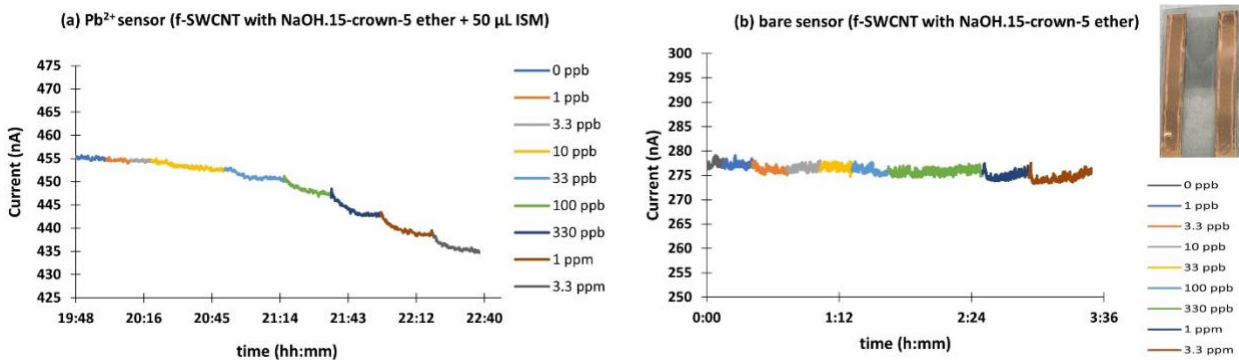

**Fig. S2** Response comparison of a Pb<sup>2+</sup> sensor and a bare sensor to lead ions in different concentrations (from 1 ppb to 3.3 ppm). (a) Resonse of a Pb<sup>2+</sup> sensor made of f-SWCNT (with NaOH.15-crown-5 ether) as a resistive film coated with ISM (Drop-casted 50 μL of ISM solution on the SWCNT film at the circular opening) and (b) a bare sensor made of f-SWCNT (with NaOH.15-crown-5 ether) as a resistive film (Image of the actual sensor on the top right of the figure).

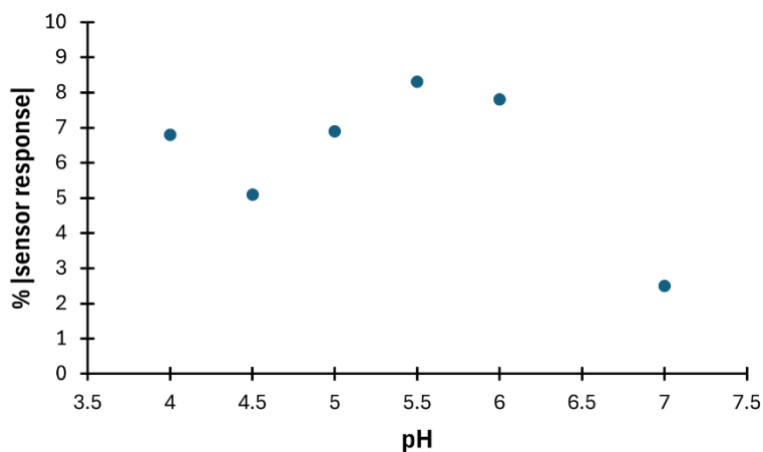

**Fig. S3** Pb<sup>2+</sup> sensor responses in a range of pH 4-7 in 200 mg/L tris-acetate buffer solution.

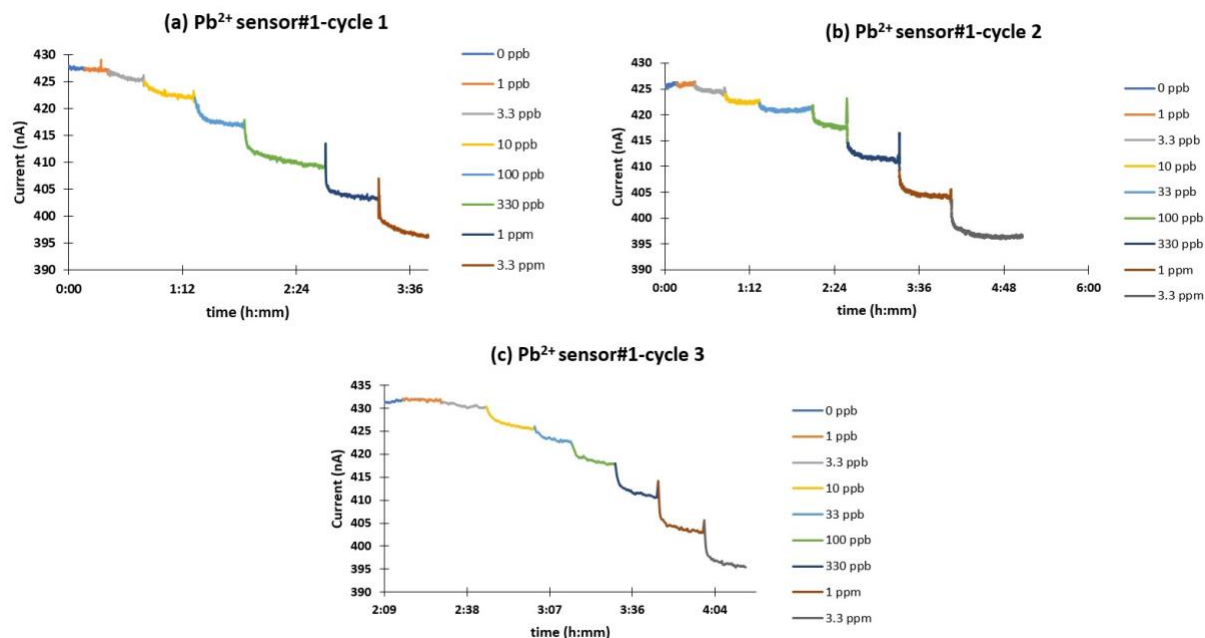

**Fig. S4** Sensor response (current changes) of a fabricated Pb<sup>2+</sup> sensor to various concentrations between 1 ppb to 3.3 ppm vs. time over three cycles. (a) sensor response in first cycle, (b) sensor response in second cycle, (c) sensor response in third cycle.

**Table S1** Performance of tested Pb<sup>2+</sup> sensors in three batches with different resistance ranges of CNT films

| Sensor             | Resistance of CNT film (kΩ) | % Sensor response | Lowest detectable concentration (ppb) | Response time at first detectable concentration (s) |
|--------------------|-----------------------------|-------------------|---------------------------------------|-----------------------------------------------------|
| <b>Batch No. 1</b> |                             |                   |                                       |                                                     |
| Sensor#1           | 9.2                         | 7.6               | 3.3                                   | 8.6                                                 |
| Sensor#2           | 9.6                         | 7.5               | 3.3                                   | 8.1                                                 |
| Sensor#3           | 8.9                         | 7.8               | 3.3                                   | 7.9                                                 |
| <b>Batch No. 2</b> |                             |                   |                                       |                                                     |
| Sensor#9           | 5.5                         | 6.8               | 10                                    | 10.2                                                |
| Sensor#10          | 6.1                         | 7.2               | 10                                    | 11.5                                                |
| Sensor#11          | 7.8                         | 7.7               | 3.3                                   | 10.9                                                |
| <b>Batch No. 3</b> |                             |                   |                                       |                                                     |
| Sensor#13          | 12.3                        | 4.3               | 10                                    | 7.5                                                 |
| Sensor#14          | 12.8                        | 3.8               | 33                                    | 7.2                                                 |
| Sensor#15          | 13.2                        | 2.9               | 33                                    | 7.8                                                 |

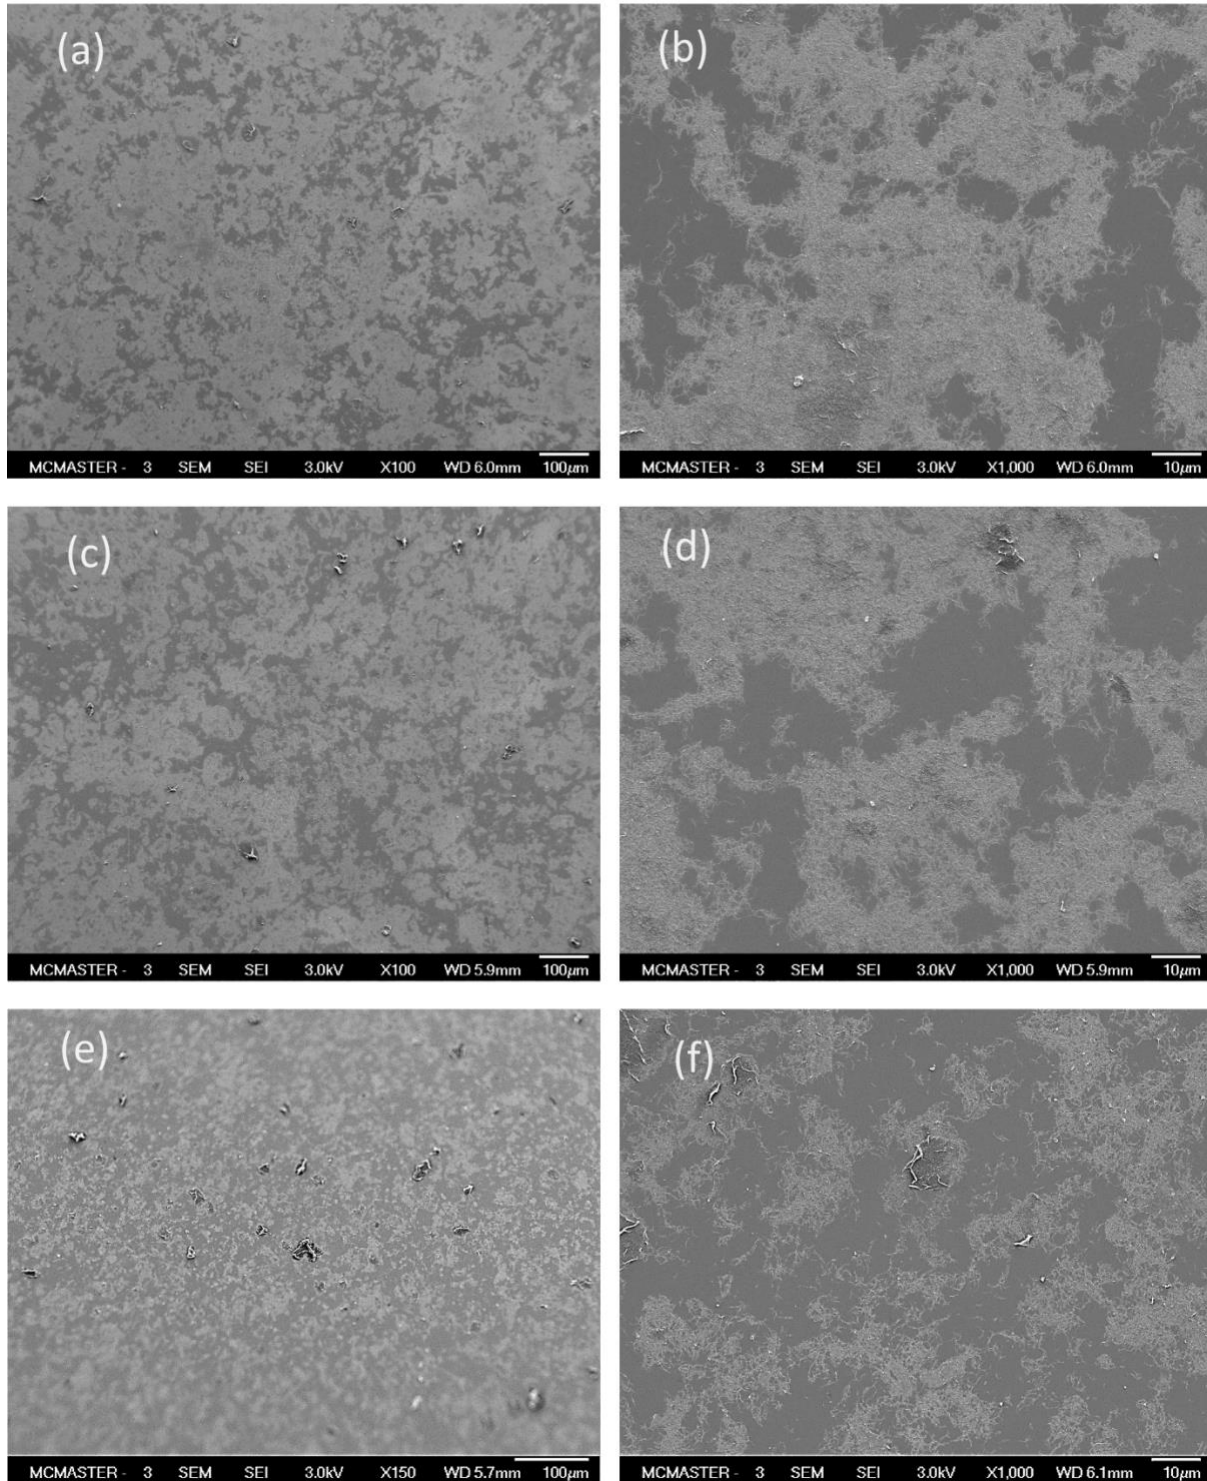

**Fig. S5** SEM images of air-brushed CNT films of three different batches in two bar scales of 100  $\mu\text{m}$  and 10  $\mu\text{m}$ . (a & b) SEM images of a representative CNT film of batch No. 1 (resistance 9.2  $\text{k}\Omega$ ), (c & d) batch No. 2 (resistance 5.5  $\text{k}\Omega$ ), (e & f) batch No. 3 (resistance 12.3  $\text{k}\Omega$ ).

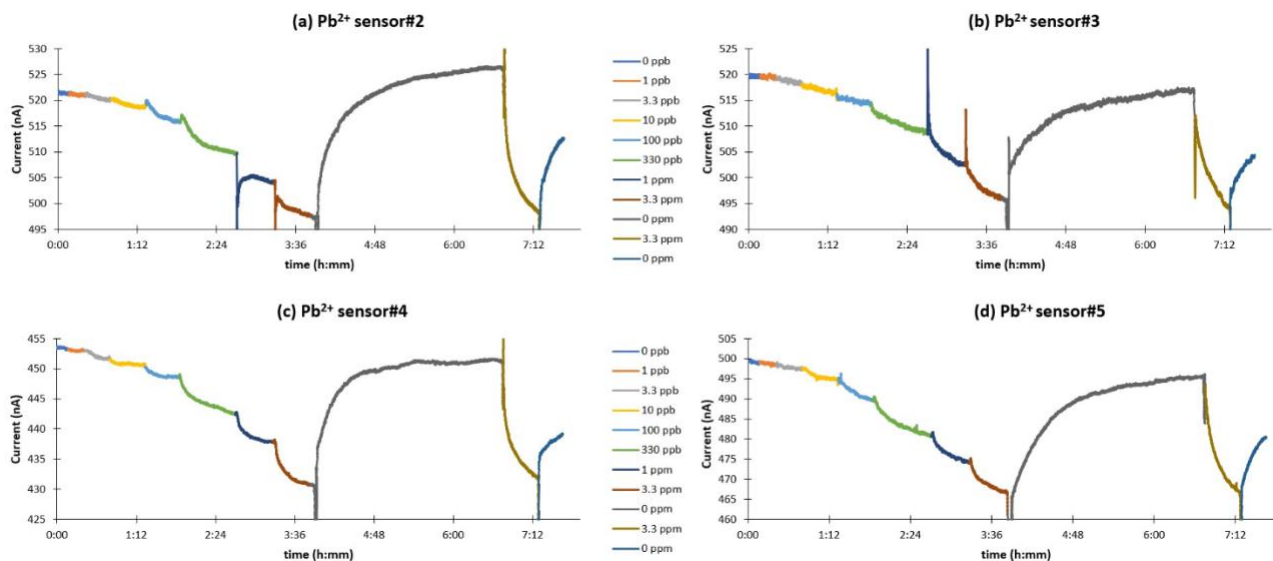

**Fig. S6** Responses of several fabricated  $Pb^{2+}$  sensors and their recovery over time in a  $Pb^{2+}$  concentration range of 1 ppb to 3.3 ppm. (a) performance of  $Pb^{2+}$  sensor#2, (b)  $Pb^{2+}$  sensor#3, (c)  $Pb^{2+}$  sensor#4, and (d)  $Pb^{2+}$  sensor#5.

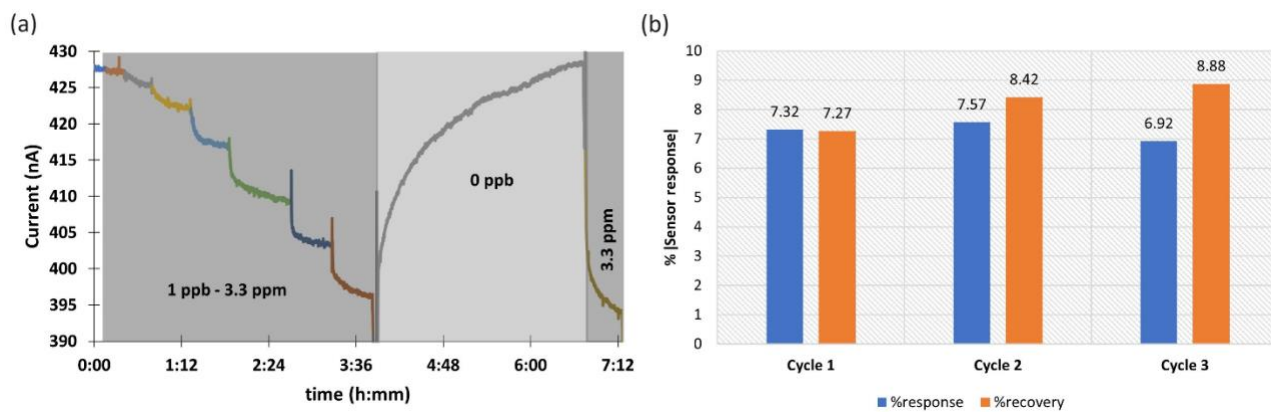

**Fig. S7** (a) Lead sensor's response and recovery between 0 ppb and 3300 ppb of  $Pb^{2+}$  ions, (b) absolute values of response and recovery percentages of a fabricated lead sensor between 0 ppb and 3300 ppb of  $Pb^{2+}$  ions over three cycles

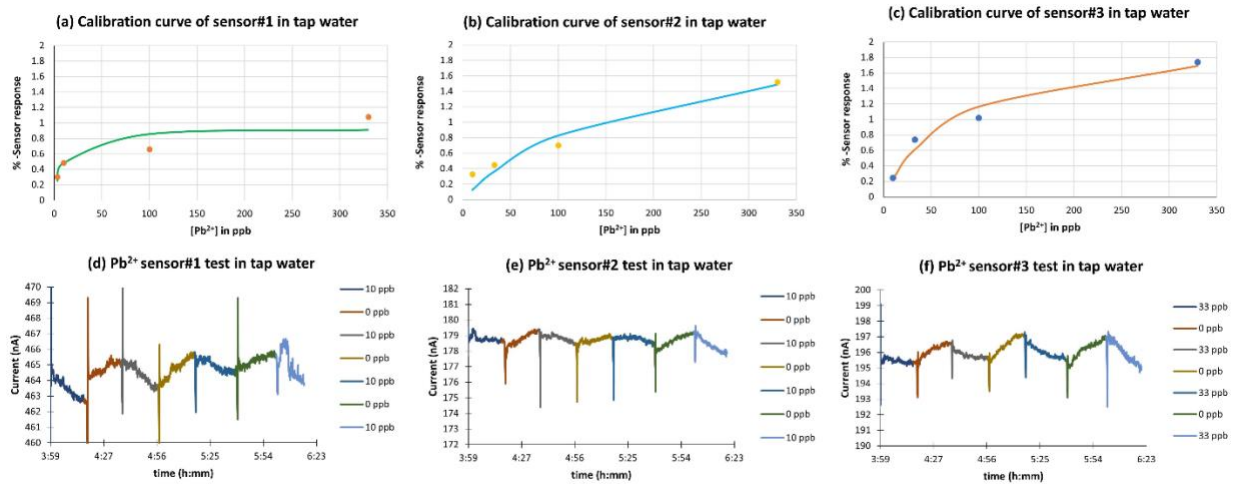

**Fig. S8** Calibration curves of  $Pb^{2+}$  sensors prepared for real sample test and the response of the sensor to 10 ppb and 30 ppb of  $Pb^{2+}$  ion. (a) Calibration curve of sensor#1, (b) sensor#2 and (c) sensor#3 in tap water in a range of 10 ppb to 330 ppb of  $Pb^{2+}$  ions, (d) response of the sensor#1 to 10 ppb of  $Pb^{2+}$ , (e) response of the sensor#2 to 10 ppb of  $Pb^{2+}$ , and (f) response of the sensor#3 to 33 ppb of  $Pb^{2+}$  over three cycles ( $n=3$ ) in tap water.

**Table S2** Hall measurement data of the four-probe device on Si/SiO<sub>2</sub> substrate with sputter coated Au contacts after different fabrication steps, exposure to and removal of  $Pb^{2+}$  ions.

| <i>Sample</i>                                      | <i>Sheet resistivity (kΩ/sq)</i> | <i>Sheet Hall resistance coef. (m<sup>2</sup>/C)</i> | <i>Hall mobility (cm<sup>2</sup>/V.s)</i> | <i>Sheet concentration (Carrier density) (cm<sup>-2</sup>)</i> |
|----------------------------------------------------|----------------------------------|------------------------------------------------------|-------------------------------------------|----------------------------------------------------------------|
| Pristine SWCNT                                     | 8.304                            | 2.46                                                 | 70.7                                      | $2.5 \times 10^{14}$                                           |
| f-SWCNT                                            | 21.5                             | -43.2                                                | 20.1                                      | $-1.4 \times 10^{13}$                                          |
| f-SWCNT coated with ISM                            | 24.04                            | 579                                                  | 241                                       | $1.078 \times 10^{12}$                                         |
| Exposed to 3 ppm of $Pb^{2+}$ for 24 hours         | 13.76                            | -14                                                  | 10.2                                      | $-4.461 \times 10^{13}$                                        |
| Washing off $Pb^{2+}$ ions in DI water for 5 hours | 9.806                            | 16.9                                                 | 211                                       | $3.69 \times 10^{13}$                                          |

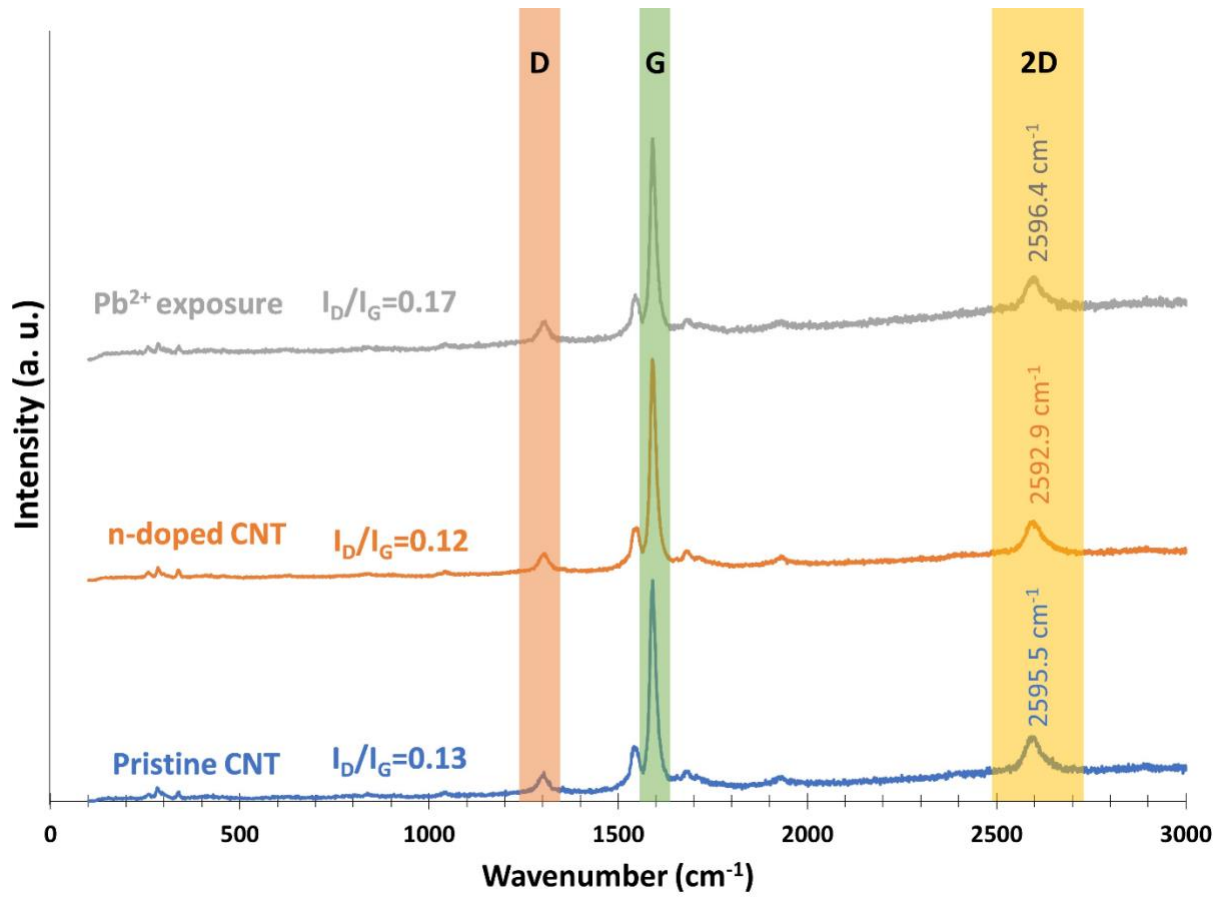

**Fig. S9** Raman spectra of pristine CNT, n-doped CNT and n-doped CNT exposed to 3 ppm of Pb<sup>2+</sup> ions for 5 hours.
